## WITHDRAWN ARTICLE

## WITHDRAWN: Remifentanil preconditioning alleviates myocardial ischemia/reperfusion injury in rats via activating Jagged-1/Notch signaling pathway

Dejun Cao; Shaoxing Liu; Mengchang Yang; Keyu Xie; Zhuo Zheng; Hucheng Wen; Xianfeng Xie

*Biosci Rep* (2021) BSR20210534; **DOI:** 10.1042/BSR20210534

The Accepted Manuscript version of this article (published on 10 May 2021) was withdrawn on 30 June 2021. Following the acceptance of this article, one of the Editors-in-Chief of the *Brazilian Journal of Medical and Biological Research* alerted the Editorial Office of *Bioscience Reports* that this paper was submitted to and considered simultaneously in both journals. This goes against the Editorial Policies of *Bioscience Reports*, hence the accepted article has been withdrawn.
